# Supplementary material for: A Novel Strain of Tomato Leaf Curl New Delhi Virus Has Spread to the Mediterranean Basin
Source: MDPI journal article supplement (doi:10.3390/v8110307), 2016-11-11

# Supplementary Materials: A Novel Strain of Tomato Leaf Curl New Delhi Virus Has Spread to the Mediterranean Basin

Isabel M. Fortes, Sonia Sánchez-Campos, Elvira Fiallo-Olivé, Juan A. Díaz-Pendón, Jesús Navas-Castillo and Enrique Moriones

**Table S1.** Name, acronym and accession numbers of DNA-A component of tomato leaf curl New Delhi virus isolates used in this study. In the “Strain” column, isolates that potentially correspond to different strains are highlighted with asterisks (“ES” for the Spanish isolates); same number/letters indicates isolates within the same relationship group according to Supplementary Figure S1; “Other species” indicates sequences that do not correspond to *Tomato leaf curl New Delhi virus* species according to ICTV criteria.

| Tomato Leaf Curl New Delhi virus isolate                            | Acronym                   | DNA-A GenBank<br>Accession Number<br>(DNA-A) | Strain       |
|---------------------------------------------------------------------|---------------------------|----------------------------------------------|--------------|
| Tomato leaf curl New Delhi virus - [India-New Delhi-Severe-1992]    | ToLCNDV-[IN-ND-Svr-92]    | U15015                                       |              |
| Tomato leaf curl New Delhi virus - [India-New Delhi-Mild-1992]      | ToLCNDV-[IN-ND-Mld-92]    | U15016                                       |              |
| Tomato leaf curl New Delhi virus - [India-Meerut-Potato 12-2002]    | ToLCNDV-[IN-Mee-Po12-02]  | AY286316                                     |              |
| Tomato leaf curl New Delhi virus - [India-Haryana-2003]             | ToLCNDV-[IN-Har-03]       | FJ561298                                     | Other specie |
| Tomato leaf curl New Delhi virus - [India-Karnal-OY81A-2004]        | ToLCNDV-[IN-Kar-OY81A-04] | GU112082                                     |              |
| Tomato leaf curl New Delhi virus - [India-New Delhi-2005]           | ToLCNDV-[IN-ND-05]        | DQ169056                                     |              |
| Tomato leaf curl New Delhi virus - [India-New Delhi-Pumpkin 1-2005] | ToLCNDV-[IN-ND-Pum1-05]   | AM286433                                     |              |
| Tomato leaf curl New Delhi virus - [India-New Delhi-Pumpkin 2-2005] | ToLCNDV-[IN-ND-Pum2-05]   | AM286434                                     |              |
| Tomato leaf curl New Delhi virus - [India-Happur-Potato-2005]       | ToLCNDV-[IN-Hap-Pot-05]   | EF043230                                     |              |
| Tomato leaf curl New Delhi virus - [India-Meerut-Potato-2005]       | ToLCNDV-[IN-Mer-Pot-05]   | EF043231                                     |              |
| Tomato leaf curl New Delhi virus - [India-Bangalore-OY135-2005]     | ToLCNDV-[IN-Ban-OY135-05] | GU112084                                     |              |
| Tomato leaf curl New Delhi virus - [India-Sonepat-Luffa-2005]       | ToLCNDV-[IN-Son-Luf-05]   | AY939926                                     |              |
| Tomato leaf curl New Delhi virus - [India-New Delhi-Papaya-2005]    | ToLCNDV-[IN-ND-Pap-05]    | DQ989325                                     |              |
| Tomato leaf curl New Delhi virus - [India-New Delhi-2006]           | ToLCNDV-[IN-ND-06]        | EF068246                                     |              |
| Tomato leaf curl New Delhi virus - [India-IARI-Pumpkin-2006]        | ToLCNDV-[IN-IARI-pum-06]  | JN129254                                     |              |
| Tomato leaf curl New Delhi virus - [India-Himachal-Potato-2006]     | ToLCNDV-[IN-Him-Pot-06]   | AM850115                                     |              |

Table S1. Cont.

| Tomato Leaf Curl New Delhi virus isolate                                        | Acronym                     | DNA-A GenBank<br>Accession Number<br>(DNA-A) | Strain |
|---------------------------------------------------------------------------------|-----------------------------|----------------------------------------------|--------|
| Tomato leaf curl New Delhi virus - [India-Guntur-OY136B-2006]                   | ToLCNDV-[IN-Gun-OY136B-06]  | GU112086                                     |        |
| Tomato leaf curl New Delhi virus - [India-Aurangabad-OY164A-2006]               | ToLCNDV-[IN-Aur-OY164A-06]  | GU112088                                     |        |
| Tomato leaf curl New Delhi virus - [India-Bahraich-Chilli-2006]                 | ToLCNDV-[IN-Bah-Chi-06]     | EU309045                                     |        |
| Tomato leaf curl New Delhi virus - [India-Haryana-Lagenaria ciceraria-2007]     | ToLCNDV-[IN-Har-Lc-07]      | FN645905                                     | *2     |
| Tomato leaf curl New Delhi virus - [India-Tumkur-Chilli-2008]                   | ToLCNDV-[IN-Tum-chi-08]     | HM007120                                     |        |
| Tomato leaf curl New Delhi virus - [India-New Delhi-Lufa acutangula-JLH13-2008] | ToLCNDV-[IN-ND-La-JLH13-08] | HM989845                                     |        |
| Tomato leaf curl New Delhi virus - [India-Pune-2008]                            | ToLCNDV-[IN-Pun-08]         | HM345979                                     |        |
| Tomato leaf curl New Delhi virus - [India-Pune-JID27-2008]                      | ToLCNDV-[IN-Pun-JID27-08]   | HQ141673                                     |        |
| Tomato leaf curl New Delhi virus - [India-Pune 8-2008]                          | ToLCNDV-[IN-Pun8-08]        | FJ468356                                     |        |
| Tomato leaf curl New Delhi virus - [India-TC55-2008]                            | ToLCNDV-[IN-And-Tomato-08]  | KP178728                                     |        |
| Tomato leaf curl New Delhi virus - [India-TC89-2008]                            | ToLCNDV-[IN-TC89-08]        | KP195265                                     |        |
| Tomato leaf curl New Delhi virus - [India-TC57-2008]                            | ToLCNDV-[IN-TC57-08]        | KP195259                                     |        |
| Tomato leaf curl New Delhi virus - [India-Salem-2008]                           | ToLCNDV-[IN-Salem-08]       | KP235541                                     |        |
| Tomato leaf curl New Delhi virus - [India-Muskabad-TC242-2009]                  | ToLCNDV-[IN-Mus-TC242-09]   | KF551580                                     |        |
| Tomato leaf curl New Delhi virus - [India-New Delhi-Chilli-2009]                | ToLCNDV-[IN-ND-chi-09]      | HM007113                                     |        |
| Tomato leaf curl New Delhi virus - [India-Tom5-2009]                            | ToLCNDV-[IN-Tom5-09]        | KF571461                                     |        |
| Tomato leaf curl New Delhi virus - [India-2009]                                 | ToLCNDV-[IN-09]             | HM159454                                     |        |
| Tomato leaf curl New Delhi virus - [India-Maharastra-Eggplant-2009]             | ToLCNDV-[IN-Mah-Eggp-09]    | HQ264185                                     |        |
| Tomato leaf curl New Delhi virus - [India-Rauke-TC237-2009]                     | ToLCNDV-[IN-Rau-TC237-09]   | KF551582                                     |        |
| Tomato leaf curl New Delhi virus - [India-New Delhi-2009]                       | ToLCNDV-[IN-ND-09]          | GQ865546                                     |        |
| Tomato leaf curl New Delhi virus - [India-Muskabad-TC243-2009]                  | ToLCNDV-[IN-Mus-TC243-09]   | KF551587                                     |        |
| Tomato leaf curl New Delhi virus - [India-TC151-2009]                           | ToLCNDV-[IN-TC151-09]       | KP178727                                     |        |
| Tomato leaf curl New Delhi virus - [India-Palampur-2009]                        | ToLCNDV-[IN-Palampur-09]    | KP235540                                     |        |
| Tomato leaf curl New Delhi virus - [India-Pune-2009]                            | ToLCNDV-[IN-Pune-09]        | KP235542                                     |        |
| Tomato leaf curl New Delhi virus - [India-TC260-2009]                           | ToLCNDV-[IN-TC260-09]       | KP178729                                     |        |

Table S1. Cont.

| Tomato Leaf Curl New Delhi virus isolate                                   | Acronym                    | DNA-A GenBank<br>Accession Number<br>(DNA-A) | Strain       |
|----------------------------------------------------------------------------|----------------------------|----------------------------------------------|--------------|
| Tomato leaf curl New Delhi virus - [India-Faizabad-FAI-19-2010]            | ToLCNDV-[IN-Fai-FAI-19-10] | KC874505                                     |              |
| Tomato leaf curl New Delhi virus - [India-Gwalior-GWA-5-2010]              | ToLCNDV-[IN-Gwa-GWA-5-10]  | KC874504                                     |              |
| Tomato leaf curl New Delhi virus - [India-Shahjapur-H-SJ-2-2010]           | ToLCNDV-[IN-Sha-H-SJ-2-10] | KC874502                                     |              |
| Tomato leaf curl New Delhi virus - [India-Jalandhar-JAL-10-2010]           | ToLCNDV-[IN-Jal-JAL-10-10] | KC874509                                     |              |
| Tomato leaf curl New Delhi virus - [India-Modipuram-MOD-21-2010]           | ToLCNDV-[IN-Mod-MOD-21-10] | KC874508                                     |              |
| Tomato leaf curl New Delhi virus - [India-Hisar-HIS-4-2010]                | ToLCNDV-[IN-His-HIS-4-10]  | KC874503                                     |              |
| Tomato leaf curl New Delhi virus - [India-Ash gourd-2011]                  | ToLCNDV-[IN-Ag-11]         | JN208136                                     |              |
| Tomato leaf curl New Delhi virus - [India-Varanasi-2B-2011]                | ToLCNDV-[IN-Var-2B-11]     | KF537780                                     |              |
| Tomato leaf curl New Delhi virus - [India-Modipuram-MOD2-4-2011]           | ToLCNDV-[IN-Mod-MOD2-4-11] | KC874507                                     |              |
| Tomato leaf curl New Delhi virus - [India-Deesa-DEE-1-2011]                | ToLCNDV-[IN-Dee-DEE-1-11]  | KC874506                                     |              |
| Tomato leaf curl New Delhi virus - [India-Kolkata-TC349-2011]              | ToLCNDV-[IN-Kol-TC349-11]  | KF551589                                     |              |
| Tomato leaf curl New Delhi virus - [India-Kolkata-TC350-2011]              | ToLCNDV-[IN-Kol-TC350-11]  | KF551590                                     |              |
| Tomato leaf curl New Delhi virus - [India-Junagad-TC307-2011]              | ToLCNDV-[IN-Jun-TC307-11]  | KF551577                                     |              |
| Tomato leaf curl New Delhi virus - [India-Junagad-TC309-2011]              | ToLCNDV-[IN-Jun-TC309-11]  | KF551576                                     | *5           |
| Tomato leaf curl New Delhi virus - [India-TC305-2011]                      | ToLCNDV-[IN-TC305-11]      | KP195262                                     |              |
| Tomato leaf curl New Delhi virus 2 - [India-IANDS1-2011]                   | ToLCNDV2-[IN-IANDS1-11]    | JQ897969                                     | Other specie |
| Tomato leaf curl New Delhi virus 4 - [India-Junagad-TC306-2011]            | ToLCNDV4-[IN-Jun-TC306-11] | KF551592                                     | Other specie |
| Tomato leaf curl New Delhi virus - [India-Lucknow-Papaver somniferum-2012] | ToLCNDV-[IN-Luc-Psom-12]   | KC513822                                     |              |
| Tomato leaf curl New Delhi virus - [India-Delhi-Cucumis sativus-2012]      | ToLCNDV-[IN-Del-Csar-12]   | KC545812                                     |              |
| Tomato leaf curl New Delhi virus - [India-Raebareli-2012]                  | ToLCNDV-[IN-Rae-12]        | JX232220                                     |              |
| Tomato leaf curl New Delhi virus - [India-New Delhi-2012]                  | ToLCNDV-[IN-ND-12]         | JX460805                                     |              |
| Tomato leaf curl New Delhi virus - [India-Junagadh-2012]                   | ToLCNDV-[IN-Junagadh-12]   | KF515617                                     |              |
| Tomato leaf curl New Delhi virus - [India-Bhavnagar-2012]                  | ToLCNDV-[IN-Bhavnagar-12]  | KF515616                                     |              |
| Tomato leaf curl New Delhi virus 3 - [India-Bijnor-Chilli-2012]            | ToLCNDV3-[IN-Bij-Chi-12]   | KC465466                                     | *1           |
| Tomato leaf curl New Delhi virus - [India-RG5-2013]                        | ToLCNDV-[IN-RG5-13]        | KT426907                                     | *4           |

Table S1. Cont.

| Tomato Leaf Curl New Delhi virus isolate                                 | Acronym                      | DNA-A GenBank<br>Accession Number<br>(DNA-A) | Strain |
|--------------------------------------------------------------------------|------------------------------|----------------------------------------------|--------|
| Tomato leaf curl New Delhi virus - [India-RG4-2013]                      | ToLCNDV-[IN-RG4-13]          | KT426906                                     | *4     |
| Tomato leaf curl New Delhi virus - [India-RG3-2013]                      | ToLCNDV-[IN-RG3-13]          | KT426905                                     | *4     |
| Tomato leaf curl New Delhi virus - [India-RG2-2013]                      | ToLCNDV-[IN-RG2-13]          | KT426904                                     | *4     |
| Tomato leaf curl New Delhi virus - [India-RG1-2013]                      | ToLCNDV-[IN-RG1-13]          | KT426903                                     | *4     |
| Tomato leaf curl New Delhi virus - [India-pp78-2013]                     | ToLCNDV-[IN-pp78-13]         | KJ000564                                     |        |
| Tomato leaf curl New Delhi virus - [India-BG1-2014]                      | ToLCNDV-[IN-BG1-14]          | KP868764                                     |        |
| Tomato leaf curl New Delhi virus - [India-TN TDK CHOU2-2014]             | ToLCNDV-[IN-TN TDK CHOU2-14] | KP191047                                     | *3     |
| Tomato leaf curl New Delhi virus - [India-New Delhi-AVT1]                | ToLCNDV-[IN-ND-AVT1]         | AY428769                                     |        |
| Tomato leaf curl New Delhi virus - [India-Lucknow]                       | ToLCNDV-[IN-Luc]             | Y16421                                       |        |
| Tomato leaf curl New Delhi virus - [India-Udayapur-okra-OY142]           | ToLCNDV-[IN-Uda-Okr-OY142]   | EF035482                                     |        |
| Tomato leaf curl New Delhi virus - [Pakistan-Solanum nigrum-1997]        | ToLCNDV-[PK-Sn-97]           | AJ620187                                     |        |
| Tomato leaf curl New Delhi virus - [Pakistan-Islamabad-T1/8-2000]        | ToLCNDV-[PK-Isl-T1/8-00]     | AF448059                                     |        |
| Tomato leaf curl New Delhi virus - [Pakistan-Dargai-T5/6-2001]           | ToLCNDV-[PK-Dar-T5/6-01]     | AF448058                                     |        |
| Tomato leaf curl New Delhi virus - [Pakistan-Solanum nigrum-2004]        | ToLCNDV-[PK-Sn-04]           | DQ116885                                     |        |
| Tomato leaf curl New Delhi virus - [Pakistan-Solanum nigrum-PT10-2004]   | ToLCNDV-[PK-Sn-PT10-04]      | DQ116883                                     |        |
| Tomato leaf curl New Delhi virus - [Pakistan-Khalawal-Chili-2004]        | ToLCNDV-[PK-Kha-Chi-04]      | DQ116880                                     |        |
| Tomato leaf curl New Delhi virus - [Pakistan-Multan-Luffa-2004]          | ToLCNDV-[PK-Mul-Luf-04]      | AM292302                                     |        |
| Tomato leaf curl New Delhi virus - [Pakistan-Lahore-2004]                | ToLCNDV-[PK-Lah-04]          | AM258977                                     |        |
| Tomato leaf curl New Delhi virus - [Pakistan-Lahore-Solanum nigrum-2004] | ToLCNDV-[PK-Lah-Sn-04]       | AM849548                                     |        |
| Tomato leaf curl New Delhi virus - [Pakistan-Lahore-2004]                | ToLCNDV-[PK-Lah-04]          | AM491590                                     | *2     |
| Tomato leaf curl New Delhi virus - [Pakistan-2006] ToLCNDV-[PK-06]       | ToLCNDV-[PK-06]              | EF620534                                     |        |
| Tomato leaf curl New Delhi virus - [Pakistan-Multan-2006]                | ToLCNDV-[PK-Mul-06]          | HQ658479                                     |        |
| Tomato leaf curl New Delhi virus - [Pakistan-Multan-Momordica-2007]      | ToLCNDV-[PK-Mul-Mom-07]      | AM747291                                     |        |
| Tomato leaf curl New Delhi virus - [Pakistan-2008]                       | ToLCNDV-[PK-08]              | AM947506                                     |        |

Table S1. Cont.

| Tomato Leaf Curl New Delhi virus isolate                                                    | Acronym                       | DNA-A GenBank<br>Accession Number<br>(DNA-A) | Strain       |
|---------------------------------------------------------------------------------------------|-------------------------------|----------------------------------------------|--------------|
| Tomato leaf curl New Delhi virus - [Pakistan-Solanum-MS4-2009]                              | ToLCNDV-[PK-Sol-MS4-09]       | FN435310                                     |              |
| Tomato leaf curl New Delhi virus - [Pakistan-Solanum-MS1-2009]                              | ToLCNDV-[PK-Sol-MS1-09]       | FN435309                                     |              |
| Tomato leaf curl New Delhi virus - [Pakistan-Chenopodium album-Mn-05-2012]                  | ToLCNDV-[PK-Cal-Mn-05-12]     | KC914896                                     |              |
| Tomato leaf curl New Delhi virus - [Pakistan-47SB-2012]                                     | ToLCNDV-[PK-47SB-12]          | KT948072                                     |              |
| Tomato leaf curl New Delhi virus - [Pakistan-Lahore-Convolvulus arvensis-2013]              | ToLCNDV-[PK-Lah-Car-13]       | KC960492                                     |              |
| Tomato leaf curl New Delhi virus - [Pakistan-Lahore-Rumex dentatus-2013]                    | ToLCNDV-[PK-Lah-Rd-13]        | HG316125                                     |              |
| Tomato leaf curl New Delhi virus - [Pakistan-Parthenium hysterophorus-2013]                 | ToLCNDV-[PK-Phy-13]           | KF002409                                     |              |
| Tomato leaf curl New Delhi virus - [Bangladesh-Jessore- Severe-2005]                        | ToLCNDV-[BG-Jes-Svr -05]      | AJ875157                                     |              |
| Tomato leaf curl New Delhi virus - [Bangladesh-Chi-01-13-Tom-2006]                          | ToLCNDV[BD-Chi-01-13-Tom-06]  | KM383744                                     |              |
| Tomato leaf curl New Delhi virus - [Bangladesh-Joy-01-02-Tom-2006]                          | ToLCNDV-[BD-Joy-01-02-Tom-06] | KM383740                                     |              |
| Tomato leaf curl New Delhi virus - [Bangladesh-Joy-02-03-Tom-2006]                          | ToLCNDV-[BD-Joy-02-03-Tom-06] | KM383738                                     |              |
| Tomato leaf curl New Delhi virus - [Bangladesh-Syl-01-19-Tom-2006]                          | ToLCNDV-[BD-Syl-01-19-Tom-06] | KM383737                                     |              |
| Tomato leaf curl New Delhi virus - [Bangladesh-Cucumber-2006]                               | ToLCNDV-[BD-cuc-06]           | EF450316                                     | Other specie |
| Tomato leaf curl New Delhi virus - [Bangladesh-Joy-03-07-Tom-2007]                          | ToLCNDV-[BD-Joy-03-07-Tom-07] | KM383739                                     |              |
| Tomato leaf curl New Delhi virus - [Bangladesh-Tha-01-37-Tom-2009]                          | ToLCNDV-[BD-Tha-01-37-Tom-09] | KM383736                                     |              |
| Tomato leaf curl New Delhi virus - [Bangladesh-Jam-01-40-Tom-2010]                          | ToLCNDV-[BD-Jam-01-40-Tom-10] | KM383743                                     |              |
| Tomato leaf curl New Delhi virus - [Bangladesh-Jam-02-44-Tom-2010]                          | ToLCNDV-[BD-Jam-02-44-Tom-10] | KM383742                                     |              |
| Tomato leaf curl New Delhi virus - [Bangladesh-Jes-01-33-Tom-2010]                          | ToLCNDV-[BD-Jes-01-33-Tom-10] | KM383741                                     |              |
| Tomato leaf curl New Delhi virus - [Thailand-Cucurbit-2006]                                 | ToLCNDV-[TH-Cuc-06]           | AB330079                                     |              |
| Tomato leaf curl New Delhi virus - [Thailand-Cucurbit-2006]                                 | ToLCNDV-[TH-Cuc-06]           | AB368448                                     |              |
| Tomato leaf curl New Delhi virus - [Thailand-Bottle gourd-2006]                             | ToLCNDV-[TH-BG-06]            | AB368447                                     |              |
| Tomato leaf curl New Delhi virus - [Thailand-Kamphaengsaen-AFSP2c-Sauropus androgynus-2010] | ToLCNDV-[TH-Kam-AFSP2c-Sa-10] | JN809814                                     |              |
| Tomato leaf curl New Delhi virus - [Thailand-Luffa]                                         | ToLCNDV-[TH-Luf]              | AF102276                                     |              |

Table S1. Cont.

| Tomato Leaf Curl New Delhi virus isolate                          | Acronym                      | DNA-A GenBank<br>Accession Number<br>(DNA-A) | Strain |
|-------------------------------------------------------------------|------------------------------|----------------------------------------------|--------|
| Tomato leaf curl New Delhi virus - [Taiwan-Melon-2007]            | ToLCNDV-[TW-Mel-07]          | GU180095                                     |        |
| Tomato leaf curl New Delhi virus - [Indonesia-Java-Cucumber-2008] | ToLCNDV-[ID-JV-Cuc-08]       | AB613825                                     |        |
| Tomato leaf curl New Delhi virus - [Iran-X3A-2013]                | ToLCNDV-[IR-X3A-13]          | KJ778694                                     |        |
| Tomato leaf curl New Delhi virus - [Iran-X1A-2013]                | ToLCNDV-[IR-X1A-13]          | KJ778692                                     |        |
| Tomato leaf curl New Delhi virus - [Iran-UZ-M9-2014]              | ToLCNDV-[IR-UZ-M9-14]        | KP641673                                     |        |
| Tomato leaf curl New Delhi virus - [Iran-UZ-C6-2014]              | ToLCNDV-[IR-UZ-C6-14]        | KP641675                                     |        |
| Tomato leaf curl New Delhi virus - [Iran-UZ-T4-2014]              | ToLCNDV-[IR-UZ-T4-14]        | KP641677                                     |        |
| Tomato leaf curl New Delhi virus - [Spain-MU-8.1-Squash-2012]     | ToLCNDV-[ES-MU-8.1-Sq-12]    | KF749224                                     | ES     |
| Tomato leaf curl New Delhi virus - [Spain-MU-11.1-Squash-2012]    | ToLCNDV-[ES-MU-11.1-Sq-12]   | KF749225                                     | ES     |
| Tomato leaf curl New Delhi virus - [Spain-Alm-661-Squash-2013]    | ToLCNDV-[ES-Alm-661-Sq-13]   | KF749223                                     | ES     |
| Tomato leaf curl New Delhi virus - [Spain-Almeria-Zucchini-2013]  | ToLCNDV-[ES-Alm-Zucchini-13] | KF891468                                     | ES     |
| Tomato leaf curl New Delhi virus - [Spain-Almeria-TomatoA4-2014]  | ToLCNDV-[ES-Alm-TomA4-14]    | KM977733                                     | ES     |
| Tomato leaf curl New Delhi virus - [Spain-Almeria-TomatoA5-2014]  | ToLCNDV-[ES-Alm-TomA5-14]    | KT175406                                     | ES     |

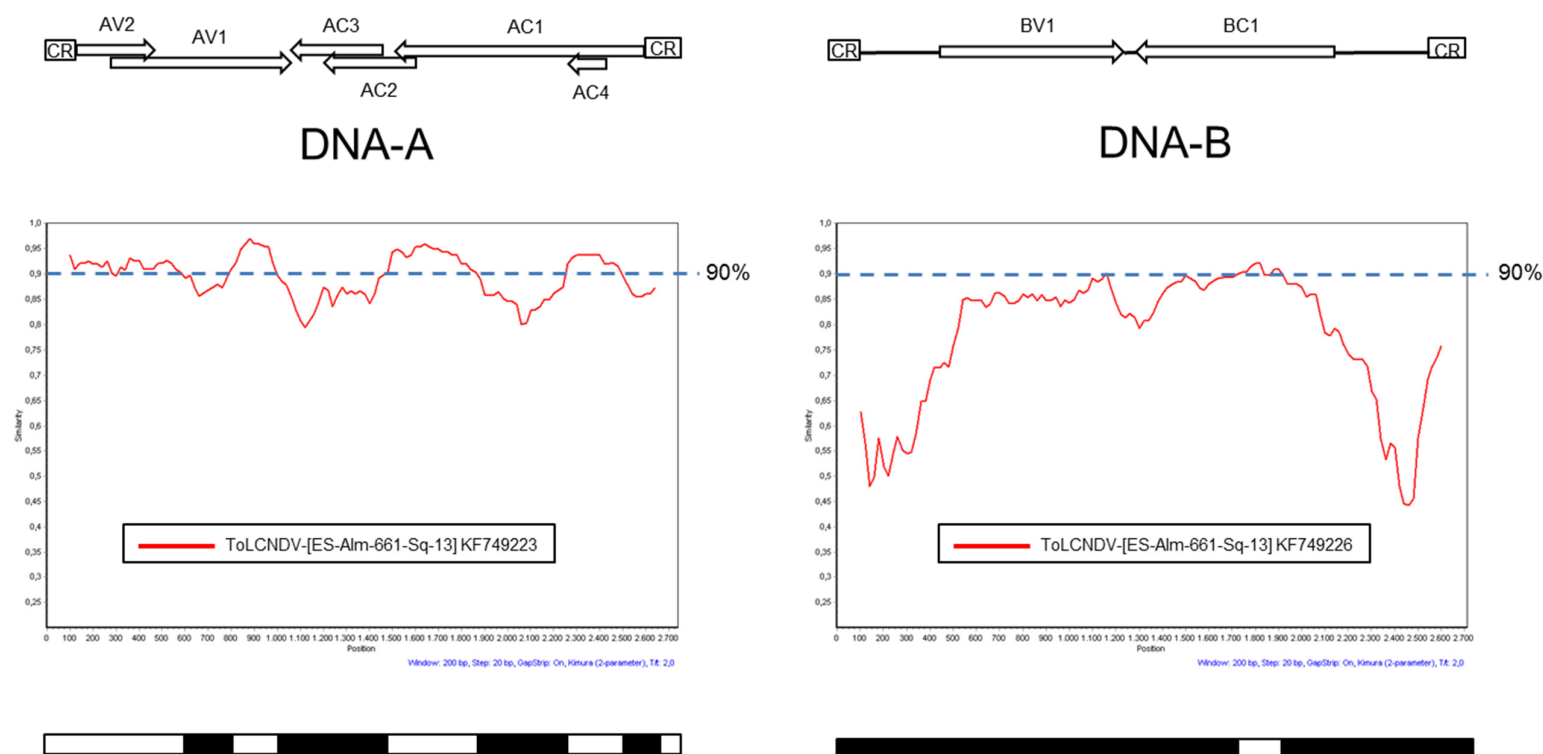

**Figure S2.** Plotsimilarity diagrams comparing DNA-A and DNA-B nucleotide sequences of tomato leaf curl New Delhi virus isolates. Plotsimilarity diagrams (scanning window 200 nt) comparing the nucleotide sequences of DNA-A and DNA-B of isolate [ES-Alm-661-Sq-13] of tomato leaf curl New Delhi virus (ToLCNDV-[ES-Alm-661-Sq-13]) (this study) with the corresponding ones of the ToLCNDV isolate [IN-ND-Svr-92] (ToLCNDV-[IN-ND-Svr-92]) from India (Gen Bank accession numbers U15015 and U15017 for DNA-A and DNA-B, respectively). The regions for which less than 90% identity was observed between ToLCNDV-[ES-Alm-661-Sq-13] and ToLCNDV-[IN-ND-Svr-92] are schematically shown as black boxes at the bottom of the figure. Positions of the open reading frames and the common region (CR) are indicated at the top of the figure. The horizontal broken line indicates the position for the 90% identity between the sequences compared.

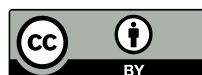

Supplement: s1 [file s1]
